# Supplementary material for: Predicting Six-Month Re-Admission Risk in Heart Failure Patients Using Multiple Machine Learning Methods: A Study Based on the Chinese Heart Failure Population Database
Source: MDPI journal article supplement (doi:10.3390/jcm12030870), 2023-01-21
Supplement: s1 [file s1]

## Supplementary Materials

Table S1. Baseline characteristic of all features

| Variable names                              | Total(Six-month re-admission) |                      | <i>p</i> -value |
|---------------------------------------------|-------------------------------|----------------------|-----------------|
|                                             | non-readmission(N=1229)       | re-admission (N=773) |                 |
| <b>destination discharge</b>                |                               |                      | <0.001          |
| dead                                        | 9 (0.7%)                      | 0 (0%)               |                 |
| Healthcare Facility                         | 258 (21%)                     | 180 (23.3%)          |                 |
| Home                                        | 810 (65.9%)                   | 533 (69%)            |                 |
| Unknown                                     | 152 (12.4%)                   | 60 (7.8%)            |                 |
| <b>admission ward</b>                       |                               |                      | 0.014           |
| Cardiology                                  | 926 (75.3%)                   | 618 (79.9%)          |                 |
| General Ward                                | 162 (13.2%)                   | 100 (12.9%)          |                 |
| ICU                                         | 11 (0.9%)                     | 4 (0.5%)             |                 |
| others                                      | 130 (10.6%)                   | 51 (6.6%)            |                 |
| <b>admission way</b>                        |                               |                      | 1               |
| Emergency                                   | 583 (47.4%)                   | 367 (47.5%)          |                 |
| Nonemergency                                | 646 (52.6%)                   | 406 (52.5%)          |                 |
| <b>occupation</b>                           |                               |                      | <0.001          |
| Famer                                       | 156 (12.7%)                   | 57 (7.4%)            |                 |
| officer                                     | 8 (0.7%)                      | 10 (1.3%)            |                 |
| Urban Resident                              | 1000 (81.4%)                  | 665 (86%)            |                 |
| worker                                      | 14 (1.1%)                     | 3 (0.4%)             |                 |
| others                                      | 51 (4.1%)                     | 38 (4.9%)            |                 |
| <b>discharge department</b>                 |                               |                      | 0.047           |
| Cardiology                                  | 1035 (84.2%)                  | 665 (86%)            |                 |
| General Ward                                | 149 (12.1%)                   | 89 (11.5%)           |                 |
| ICU                                         | 12 (1%)                       | 0 (0%)               |                 |
| others                                      | 33 (2.7%)                     | 19 (2.5%)            |                 |
| <b>visit times</b>                          |                               |                      | 0.012           |
| 1                                           | 1147 (93.3%)                  | 708 (91.6%)          |                 |
| 2                                           | 73 (5.9%)                     | 47 (6.1%)            |                 |
| 3                                           | 8 (0.7%)                      | 11 (1.4%)            |                 |
| 4                                           | 0 (0%)                        | 6 (0.8%)             |                 |
| 5                                           | 1 (0.1%)                      | 1 (0.1%)             |                 |
| gender                                      |                               |                      | 0.363           |
| male                                        | 506 (41.2%)                   | 335 (43.3%)          |                 |
| female                                      | 723 (58.8%)                   | 438 (56.7%)          |                 |
| <b>body temperature/°C</b>                  | 36.4(36.2,36.5)               | 36.3(36.2,36.5)      | 0.055           |
| <b>pulse/(beats/min)</b>                    | 84(71,100)                    | 81(70,96)            | 0.035           |
| <b>respiration/(breaths/min)</b>            | 19(18,20)                     | 19(18,19)            | 0.500           |
| <b>systolic blood pressure/mmHg</b>         | 130(118,150)                  | 128(10,144)          | <0.001          |
| <b>Kdiastolic blood pressure/mmHg</b>       | 78(68,86)                     | 74(64,84)            | 0.009           |
| <b>map/mmHg</b>                             | 95.33(84,106)                 | 92.67(82,103.33)     | <0.001          |
| <b>weight /Kg</b>                           | 50(45,60)                     | 50(45,60)            | 0.299           |
| <b>height/m</b>                             | 1.56(1.50,1.62)               | 1.56(1.50,1.62)      | 0.792           |
| <b>BMI/(kg/m^2)</b>                         | 20.83(18.63,24.44)            | 20.40(18.37,23.44)   | 0.098           |
| <b>type of heart failure</b>                |                               |                      | <0.001          |
| Left or right                               | 378 (30.8%)                   | 148 (19.1%)          |                 |
| whole                                       | 851 (69.2%)                   | 625 (80.9%)          |                 |
| <b>NYHA cardiac function classification</b> |                               |                      | <0.001          |
| 2                                           | 250 (20.3%)                   | 103 (13.3%)          |                 |
| 3                                           | 642 (52.2%)                   | 395 (51.1%)          |                 |
| 4                                           | 337 (27.4%)                   | 275 (35.6%)          |                 |
| <b>Killip grade</b>                         |                               |                      | 0.216           |
| 1                                           | 328 (26.7%)                   | 199 (25.7%)          |                 |
| 2                                           | 618 (50.3%)                   | 409 (52.9%)          |                 |
| 3                                           | 253 (20.6%)                   | 138 (17.9%)          |                 |
| 4                                           | 30 (2.4%)                     | 27 (3.5%)            |                 |
| <b>Myocardial infarction</b>                |                               |                      | 0.552           |
| 0                                           | 1138 (92.6%)                  | 722 (93.4%)          |                 |

|                                                  |                     |              |             |        |
|--------------------------------------------------|---------------------|--------------|-------------|--------|
|                                                  |                     |              |             |        |
|                                                  | 1                   | 91 (7.4%)    | 51 (6.6%)   |        |
| <b>congestive heart failure</b>                  | 0                   | 79 (6.4%)    | 57 (7.4%)   | 0.467  |
|                                                  | 1                   | 1150 (93.6%) | 716 (92.6%) |        |
| <b>peripheral vascular disease</b>               | 0                   | 1169 (95.1%) | 733 (94.8%) | 0.852  |
|                                                  | 1                   | 60 (4.9%)    | 40 (5.2%)   |        |
| <b>cerebrovascular disease</b>                   | 0                   | 1139 (92.7%) | 714 (92.4%) | 0.865  |
|                                                  | 1                   | 90 (7.3%)    | 59 (7.6%)   |        |
| <b>dementia</b>                                  | 0                   | 1172 (95.4%) | 715 (92.5%) | 0.010  |
|                                                  | 1                   | 57 (4.6%)    | 58 (7.5%)   |        |
| <b>chronic obstructive pulmonary disease</b>     | 0                   | 1086 (88.4%) | 684 (88.5%) | 0.991  |
|                                                  | 1                   | 143 (11.6%)  | 89 (11.5%)  |        |
| <b>connective tissue disease</b>                 | 0                   | 1225 (99.7%) | 773 (100%)  | 0.283  |
|                                                  | 1                   | 4 (0.3%)     | 0 (0%)      |        |
| <b>peptic ulcer disease</b>                      | 0                   | 1206 (98.1%) | 751 (97.2%) | 0.201  |
|                                                  | 1                   | 23 (1.9%)    | 22 (2.8%)   |        |
| <b>diabetes</b>                                  | 0                   | 978 (79.6%)  | 560 (72.4%) | <0.001 |
|                                                  | 1                   | 251 (20.4%)  | 213 (27.6%) |        |
| <b>Moderate to severe chronic kidney disease</b> | 0                   | 977 (79.5%)  | 554 (71.7%) | <0.001 |
|                                                  | 1                   | 252 (20.5%)  | 219 (28.3%) |        |
| <b>hemiplegia</b>                                | 0                   | 1222 (99.4%) | 768 (99.4%) | 1      |
|                                                  | 1                   | 7 (0.6%)     | 5 (0.6%)    |        |
| <b>solid tumor</b>                               | 0                   | 1204 (98%)   | 759 (98.2%) | 0.853  |
|                                                  | 1                   | 25 (2%)      | 14 (1.8%)   |        |
| <b>liver disease</b>                             | 0                   | 1177 (95.8%) | 743 (96.1%) | 0.788  |
|                                                  | 1                   | 52 (4.2%)    | 30 (3.9%)   |        |
| <b>AIDS</b>                                      | 0                   | 1225 (99.7%) | 773 (100%)  | 0.283  |
|                                                  | 1                   | 4 (0.3%)     | 0 (0%)      |        |
| <b>CCI score</b>                                 | 0                   | 31 (2.5%)    | 25 (3.2%)   | <0.001 |
|                                                  | 1                   | 501 (40.8%)  | 269 (34.8%) |        |
|                                                  | 2                   | 439 (35.7%)  | 262 (33.9%) |        |
|                                                  | 3                   | 211 (17.2%)  | 156 (20.2%) |        |
|                                                  | 4                   | 41 (3.3%)    | 51 (6.6%)   |        |
|                                                  | 5                   | 6 (0.5%)     | 9 (1.2%)    |        |
|                                                  | 6                   | 0 (0%)       | 1 (0.1%)    |        |
| <b>type II respiratory failure</b>               | 0                   | 1155 (94%)   | 734 (95%)   | 0.411  |
|                                                  | 1                   | 74 (6%)      | 39 (5%)     |        |
| <b>consciousness</b>                             | clear               | 1203 (97.9%) | 766 (99.1%) | 0.070  |
|                                                  | Responsive to Pain  | 3 (0.2%)     | 1 (0.1%)    |        |
|                                                  | Responsive to Sound | 13 (1.1%)    | 6 (0.8%)    |        |
|                                                  | Nonresponsive       | 10 (0.8%)    | 0 (0%)      |        |
| <b>Eye-opening</b>                               | 1                   | 12 (1%)      | 1 (0.1%)    | 0.064  |
|                                                  | 2                   | 3 (0.2%)     | 0 (0%)      |        |

|                                              |                         |                    |                    |        |
|----------------------------------------------|-------------------------|--------------------|--------------------|--------|
|                                              | 3                       | 14 (1.1%)          | 10 (1.3%)          |        |
|                                              | 4                       | 1200 (97.6%)       | 762 (98.6%)        |        |
| <b>verbal response</b>                       |                         |                    |                    | 0.072  |
|                                              | 1                       | 12 (1%)            | 1 (0.1%)           |        |
|                                              | 2                       | 7 (0.6%)           | 1 (0.1%)           |        |
|                                              | 3                       | 9 (0.7%)           | 9 (1.2%)           |        |
|                                              | 4                       | 2 (0.2%)           | 1 (0.1%)           |        |
|                                              | 5                       | 1199 (97.6%)       | 761 (98.4%)        |        |
| <b>movement</b>                              |                         |                    |                    | 0.321  |
|                                              | 1                       | 17 (1.4%)          | 4 (0.5%)           |        |
|                                              | 2                       | 1 (0.1%)           | 0 (0%)             |        |
|                                              | 3                       | 2 (0.2%)           | 0 (0%)             |        |
|                                              | 4                       | 1 (0.1%)           | 1 (0.1%)           |        |
|                                              | 5                       | 12 (1%)            | 10 (1.3%)          |        |
|                                              | 6                       | 1196 (97.3%)       | 758 (98.1%)        |        |
| <b>respiratory support</b>                   |                         |                    |                    | 0.422  |
|                                              | None                    | 1200 (97.6%)       | 760 (98.3%)        |        |
|                                              | IMV                     | 16 (1.3%)          | 9 (1.2%)           |        |
|                                              | NIMV                    | 13 (1.1%)          | 4 (0.5%)           |        |
| <b>oxygen inhalation</b>                     |                         |                    |                    | 0.417  |
|                                              | Ambient Air             | 63 (5.1%)          | 47 (6.1%)          |        |
|                                              | Oxygen Therapy          | 1166 (94.9%)       | 726 (93.9%)        |        |
| <b>fio2/%</b>                                |                         | 33(33,33)          | 33(33,33)          | 0.004  |
| <b>acute renal failure</b>                   |                         |                    |                    | 0.875  |
|                                              | 0                       | 1224 (99.6%)       | 771 (99.7%)        |        |
|                                              | 1                       | 5 (0.4%)           | 2 (0.3%)           |        |
| <b>outcome during hospitalization</b>        |                         |                    |                    | <0.001 |
|                                              | Alive                   | 1140 (92.8%)       | 745 (96.4%)        |        |
|                                              | Dead                    | 10 (0.8%)          | 0 (0%)             |        |
|                                              | discharge against Order | 79 (6.4%)          | 28 (3.6%)          |        |
| <b>creatinine enzymatic</b>                  |                         |                    |                    | <0.001 |
| <b>method/(umol/l)</b>                       |                         | 82.2(63.1,115.1)   | 93.9(69.7,131.0)   |        |
| <b>urea/(mmol/l)</b>                         |                         | 7.57(5.71,10.92)   | 8.6(6.24,12.33)    | <0.001 |
| <b>uric acid/(mmol/l)</b>                    |                         | 0.446(0.353,0.559) | 0.477(0.377,0.604) | <0.001 |
| <b>glomerular filtration</b>                 |                         |                    |                    | <0.001 |
| <b>rate/(mL/min/1.73 m^2)</b>                |                         | 69.78(45.87,93.65) | 57.72(39.39,82.29) |        |
| <b>cystatin/(mg/L)</b>                       |                         | 1.48(1.18,2.05)    | 1.64(1.27,2.29)    | <0.001 |
| <b>white blood cell/(*10^9/L)</b>            |                         | 6.52(5.09,8.73)    | 6.4(5.1,8.35)      | 0.305  |
| <b>monocyte ratio/%</b>                      |                         | 0.07(0.05,0.08)    | 0.07(0.05,0.08)    | 0.265  |
| <b>monocyte count/(*10^9/L)</b>              |                         | 0.42(0.32,0.589)   | 0.42(0.32,0.56)    | 0.586  |
| <b>red blood cell/(*10^12/L)</b>             |                         | 3.93(3.47,4.35)    | 3.83(3.40,4.21)    | 0.001  |
| <b>coefficient of variation of red blood</b> |                         |                    |                    | 0.021  |
| <b>cell distribution width/%</b>             |                         | 14.4(13.5,15.5)    | 14.4(13.7,15.8)    |        |
| <b>standard deviation of red blood cell</b>  |                         |                    |                    | 0.002  |
| <b>distribution width/fL</b>                 |                         | 47.6(44.9,50.9)    | 48.1(45.6,52.0)    |        |
| <b>mean corpuscular volume/fL</b>            |                         | 93.1(88.9,96.5)    | 93.5(88.8,97.7)    | 0.049  |
| <b>hematocrit/%</b>                          |                         | 0.362(0.318,0.401) | 0.355(0.313,0.391) | 0.010  |
| <b>lymphocyte count/(*10^9/L)</b>            |                         | 0.94(0.61,1.29)    | 0.93(0.66,1.29)    | 0.259  |
| <b>mean hemoglobin volume/pg</b>             |                         | 30.5(28.7,31.8)    | 30.7(29,32.2)      | 0.043  |
| <b>mean hemoglobin</b>                       |                         |                    |                    | 0.866  |
| <b>concentration/(g/L)</b>                   |                         | 326(319,333)       | 326(318,334)       |        |
| <b>mean platelet volume//fL</b>              |                         | 12.2(10.9,13.3)    | 12.1(10.9,13.1)    | 0.137  |
| <b>basophil ratio</b>                        |                         | 0.004(0.002,0.006) | 0.004(0.003,0.006) | <0.001 |
| <b>basophil count/(*10^9/L)</b>              |                         | 0.02(0.02,0.04)    | 0.03(0.02,0.04)    | 0.011  |
| <b>eosinophil ratio</b>                      |                         | 0.009(0.002,0.022) | 0.011(0.003,0.024) | 0.027  |
| <b>eosinophil count/(*10^9/L)</b>            |                         | 0.06(0.02,0.13)    | 0.06(0.02,0.15)    | 0.022  |
| <b>hemoglobin/(g/L)</b>                      |                         | 118(108,133)       | 116(100,129.5)     | 0.026  |
| <b>platelet count/(*10^9/L)</b>              |                         | 138(102,178)       | 132(99,172)        | 0.062  |
| <b>platelet distribution width/fL</b>        |                         | 16.3(16,16.6)      | 16.3(16,16.6)      | 0.272  |
| <b>platelet hematocrit/%</b>                 |                         | 0.17(0.13,0.21)    | 0.16(0.13,0.20)    | 0.027  |
| <b>neutrophil ratio</b>                      |                         | 0.76(0.69,0.83)    | 0.75(0.67,0.81)    | 0.012  |

|                                                           |                       |                        |        |
|-----------------------------------------------------------|-----------------------|------------------------|--------|
| neutrophil count/(*10 <sup>9</sup> /L)                    | 4.91(3.63,6.98)       | 4.81(3.54,6.48)        | 0.144  |
| D dimer/(mg/l)                                            | 1.28(0.83,2.28)       | 0.17(0.79,2.02)        | 0.004  |
| international normalized ratio                            | 1.20(1.12,1.34)       | 1.23(1.13,1.38)        | 0.002  |
| activated partial thromboplastin time/s                   | 33.8(30.6,37.7)       | 34.6(31.4,38.6)        | 0.003  |
| thrombin time/s                                           | 17.2(16.3,17.9)       | 17.2(16.3,17.9)        | 0.79   |
| prothrombin activity/%                                    | 69.5(58.6,78.8)       | 67.2(53.8,77.4)        | 0.003  |
| prothrombin time ratio                                    | 0.21 1.12,1.34(       | 1.23(1.14,1.38)        | 0.003  |
| fibrinogen/(g/L)                                          | 3.04(2.48,3.7)        | 3.08(2.51,3.69)        | 0.665  |
| high sensitivity troponin/(pg/mL)                         | 0.05(0.02,0.11)       | 0.063(0.029,0.121)     | <0.001 |
| carbon dioxide binding capacity/(mmol/L)                  | 23.9(21.1,26.8)       | 23.9(20.6,26.6)        | 0.184  |
| calcium/ (mmol/L)                                         | 2.28(2.17,2.39)       | 2.3(2.2,2.41)          | 0.004  |
| potassium/ (mmol/L)                                       | 3.85(3.5,4.3)         | 3.91(3.57,4.39)        | 0.003  |
| chloride/ (mmol/L)                                        | 102.8(99,106.1)       | 102.2(98.2,105.7)      | 0.032  |
| sodium/ (mmol/L)                                          | 139.2(136.3,141.7)    | 138.6(135.2,141.0)     | <0.001 |
| creatinine kinase isoenzyme to creatine kinase            | 0.17(0.12,0.25)       | 0.17(0.12,0.26)        | 0.277  |
| hydroxybutyrate dehydrogenase to lactate dehydrogenase    | 0.83(0.78,0.88)       | 0.82(0.77,0.86)        | 0.076  |
| hydroxybutyrate dehydrogenase/(U/L)                       | 190(163,227)          | 188(163,225)           | 0.393  |
| glutamic oxaloacetic transaminase/(IU/L)                  | 26(20,39)             | 26(20,37)              | 0.330  |
| creatinine kinase/(IU/L)                                  | 94(66.27,136)         | 93(66,132)             | 0.482  |
| creatinine kinase isoenzyme/(IU/L)                        | 16.25(12.4,21.2)      | 16.1(12.3,21.2)        | 0.787  |
| lactate dehydrogenase/(IU/L)                              | 229(197,278)          | 228(196,275)           | 0.808  |
| brain natriuretic peptide/(pg/ml)                         | 729.29(300.4,1685.73) | 870.85(319.42,1883.65) | 0.11   |
| nucleotidase/(U/L)                                        | 3.2(2.3,4.8)          | 3.22(2.4,4.84)         | 0.377  |
| fucosidase/(U/L)                                          | 18.6(15.9,21.7)       | 18.66(16,22.2)         | 0.455  |
| albumin/(g/L)                                             | 36.7(33.4,39.6)       | 37(33.9,40)            | 0.069  |
| white globulin ratio/(U/L)                                | 1.3(1.1,1.5)          | 1.4(1.2,1.5)           | 0.071  |
| glutamyl transpeptidase/(U/L)                             | 38.64(22,71)          | 41(25,74)              | 0.252  |
| glutamic pyruvic transaminase/(U/L)                       | 22(14,37)             | 20(13,33)              | 0.010  |
| indirect bilirubin/(umol/L)                               | 11.6(7.9,16.7)        | 12.1(8.00,17.3)        | 0.172  |
| alkaline phosphatase(umol/L)                              | 80(64,101)            | 79(65,100)             | 0.815  |
| globulin/(g/L)                                            | 27.9(24.73,31.4)      | 27.8(25,30.9)          | 0.358  |
| direct bilirubin(umol/L)                                  | 6.4(4.0,10.2)         | 6.9(4.4,10.6)          | 0.048  |
| total bilirubin(umol/L)                                   | 18.1(12.2,27.1)       | 19.2(12.7,28.3)        | 0.102  |
| total bile acid(umol/L)                                   | 5.3(3.1,8.4)          | 5.17(3.1,8.8)          | 0.826  |
| total protein/(g/L)                                       | 64.6(60.2,69.2)       | 64.99(30.5,69.3)       | 0.536  |
| cholesterol/(mmol/L)                                      | 3.6(3.1,4.3)          | 3.51(2.93,4.17)        | <0.001 |
| low density lipoprotein cholesterol triglyceride/(mmol/L) | 1.8(1.4,2.3)          | 1.74(1.3,2.17)         | 0.004  |
| high density lipoprotein cholesterol/(umol/L)             | 0.99(0.75,1.31)       | 0.94(0.71,1.31)        | 0.071  |
| GCS                                                       | 15(15,15)             | 15(15,15)              | 0.078  |
| discharge day                                             | 7(5,10)               | 8(6,11)                | <0.001 |
| age cat                                                   |                       |                        | 0.098  |
| (21-29]                                                   | 1 (0.1%)              | 3 (0.4%)               |        |
| (29-39]                                                   | 11 (0.9%)             | 1 (0.1%)               |        |
| (39-49]                                                   | 38 (3.1%)             | 18 (2.3%)              |        |
| (49-59]                                                   | 66 (5.4%)             | 40 (5.2%)              |        |
| (59-69]                                                   | 236 (19.2%)           | 130 (16.8%)            |        |
| (69-79]                                                   | 419 (34.1%)           | 295 (38.2%)            |        |
| (79-89]                                                   | 399 (32.5%)           | 244 (31.6%)            |        |
| (89-110]                                                  | 59 (4.8%)             | 42 (5.4%)              |        |

\*The Kruskal-Wallis and  $\chi^2$  tests were used to compare baseline characteristics of six-month re-admission and six-month non-readmission. The Kruskal-Wallis test was used for non-normal continuous variables and the  $\chi^2$  test was used for categorical variables.

**Table S2.** The criteria or statistical parameters for the three variable screening methods

| Variable selection methods                                                                                   | The criteria or statistical parameters                                                                                |
|--------------------------------------------------------------------------------------------------------------|-----------------------------------------------------------------------------------------------------------------------|
| a combination of single-factor regression and multi-factor regression was used to screen the study variables | Variables with $p < 0.05$ were considered statistically significant. The BH method was used to correct for $p$ values |
| LASSO regression                                                                                             | $\lambda = 0.02937$                                                                                                   |
| Random forest                                                                                                | N=500                                                                                                                 |

**Table S3.** The statistical parameters and  $p$ -values of the 12 variables

| Variable                     | $\beta$ | $p$ -value | Variable                                       | $\beta$ | $p$ -value |
|------------------------------|---------|------------|------------------------------------------------|---------|------------|
| admission ward(cardiology)   |         |            | diabetes(no)                                   |         |            |
| admission ward(general Ward) | 0.2096  | 0.254      | diabetes(yes)                                  | 0.4336  | 0.001      |
| admission ward(ICU)          | -0.9988 | 0.358      | platelet count                                 | -0.0007 | 0.7504     |
| admission ward(others)       | -0.4662 | 0.032      | basophil count                                 | 7.6110  | 0.0021     |
| D-dimer                      | -0.1061 | <0.001     | NYHA cardiac function classification (class 2) |         |            |
| discharge day                | 0.0224  | <0.001     | NYHA cardiac function classification (class 3) | 0.3733  | 0.0244     |
| uric acid                    | 0.0006  | 0.1168     | NYHA cardiac function classification (class 4) | 0.6151  | <0.001     |
| platelet hematocrit          | -1.9210 | 0.4202     | type of heart failure(left or right)           |         |            |
| glomerular filtration rate   | -0.0024 | 0.2242     | type of heart failure(whole)                   | 0.5767  | <0.001     |
| mean hemoglobin volume       | 0.0416  | 0.0170     |                                                |         |            |

**Table S4.** The criteria or statistical parameters for the six prediction models

| Methods | A combination of single-factor regression and multi-factor regression |          |             |             | LASSO regression   |          |             |             | Random forest      |          |             |             |
|---------|-----------------------------------------------------------------------|----------|-------------|-------------|--------------------|----------|-------------|-------------|--------------------|----------|-------------|-------------|
|         | AUC (95%CI)                                                           | Accuracy | Sensitivity | Specificity | AUC (95%CI)        | Accuracy | Sensitivity | Specificity | AUC (95%CI)        | Accuracy | Sensitivity | Specificity |
| LR      | 0.634(0.599,0.646)                                                    | 0.652    | 0.324       | 0.844       | 0.637(0.568,0.665) | 0.667    | 0.333       | 0.863       | 0.634(0.441,0.797) | 0.657    | 0.288       | 0.973       |
| CART    | 0.544(0.270,0.818)                                                    | 0.616    | 0.270       | 0.818       | 0.623(0.486,0.760) | 0.659    | 0.486       | 0.760       | 0.573(0.365,0.781) | 0.627    | 0.365       | 0.781       |
| XGB     | 0.565(0.401,0.728)                                                    | 0.607    | 0.401       | 0.728       | 0.547(0.419,0.675) | 0.581    | 0.419       | 0.675       | 0.556(0.405,0.707) | 0.596    | 0.405       | 0.707       |
| NB      | 0.593(0.573,0.613)                                                    | 0.587    | 0.613       | 0.573       | 0.603(0.562,0.644) | 0.592    | 0.562       | 0.644       | 0.559(0.412,0.707) | 0.521    | 0.707       | 0.412       |
| SVM     | 0.564(0.203,0.926)                                                    | 0.659    | 0.203       | 0.926       | 0.563(0.189,0.937) | 0.661    | 0.189       | 0.937       | 0.547(0.203,0.892) | 0.637    | 0.203       | 0.892       |
| RF      | 0.580(0.356,0.805)                                                    | 0.639    | 0.356       | 0.805       | 0.578(0.351,0.805) | 0.637    | 0.351       | 0.805       | 0.564(0.329,0.799) | 0.626    | 0.329       | 0.799       |

**Table S5.** The results of the three variable screening methods are used to construct the model separately.

| prediction models   | The criteria or statistical parameters                               |
|---------------------|----------------------------------------------------------------------|
| Logistic regression | Variables with $p < 0.05$ were considered statistically significant. |
| CART                | $cp=0.01$ , $nsplit=12$                                              |
| XGBoost             | $max\_depth=6$ , $eta=0.5$                                           |
| NB                  | $laplace=0$                                                          |
| SVM                 | $degree=3$ , $cost=1$                                                |
| RF                  | $N=500$                                                              |

**Table S6.** Comparison of the predictive power of a 10-variable LR model with a 12-variable LR model.

| Model names          | AUC (95%CI)        | Accuracy | Sensitivity(%) | Specificity(%) |
|----------------------|--------------------|----------|----------------|----------------|
| 10-variable LR model | 0.634(0.599-0.646) | 0.652    | 32.4           | 84.4           |
| 12-variable LR model | 0.639(0.554-0.676) | 0.657    | 32.4           | 85.2           |

**Table S7.** The results of the ROC analysis for individual clinical variables.

| Variable names                          | AUC (95%CI)        | Accuracy | Sensitivity(%) | Specificity(%) |
|-----------------------------------------|--------------------|----------|----------------|----------------|
| admission word                          | 0.490(0.106-0.919) | 0.631    | 0              | 100            |
| D-dimer                                 | 0.524(0.142-0.914) | 0.631    | 0              | 100            |
| discharge day                           | 0.608(0.420,0.775) | 0.632    | 4.50           | 97.6           |
| uric acid                               | 0.589(0.470,0.689) | 0.629    | 1.80           | 98.7           |
| platelet hematocrit                     | 0.508(0.126,0.921) | 0.631    | 0              | 100            |
| mean hemoglobin volume                  | 0.538(0.270,0.844) | 0.631    | 0              | 100            |
| basophil count                          | 0.551(0.342,0.736) | 0.632    | 3.6            | 98.15          |
| NYHA cardiac function<br>classification | 0.564(0.369,0.731) | 0.631    | 0              | 100            |
| glomerular filtration rate              | 0.607(0.568,0.649) | 0.631    | 0              | 100            |
| platelet count                          | 0.528(0.340,0.730) | 0.631    | 0              | 100            |
| type of heart failure                   | 0.573(0.317,0.829) | 0.631    | 0              | 100            |
| diabetes                                | 0.520(0.243,0.797) | 0.631    | 0              | 100            |

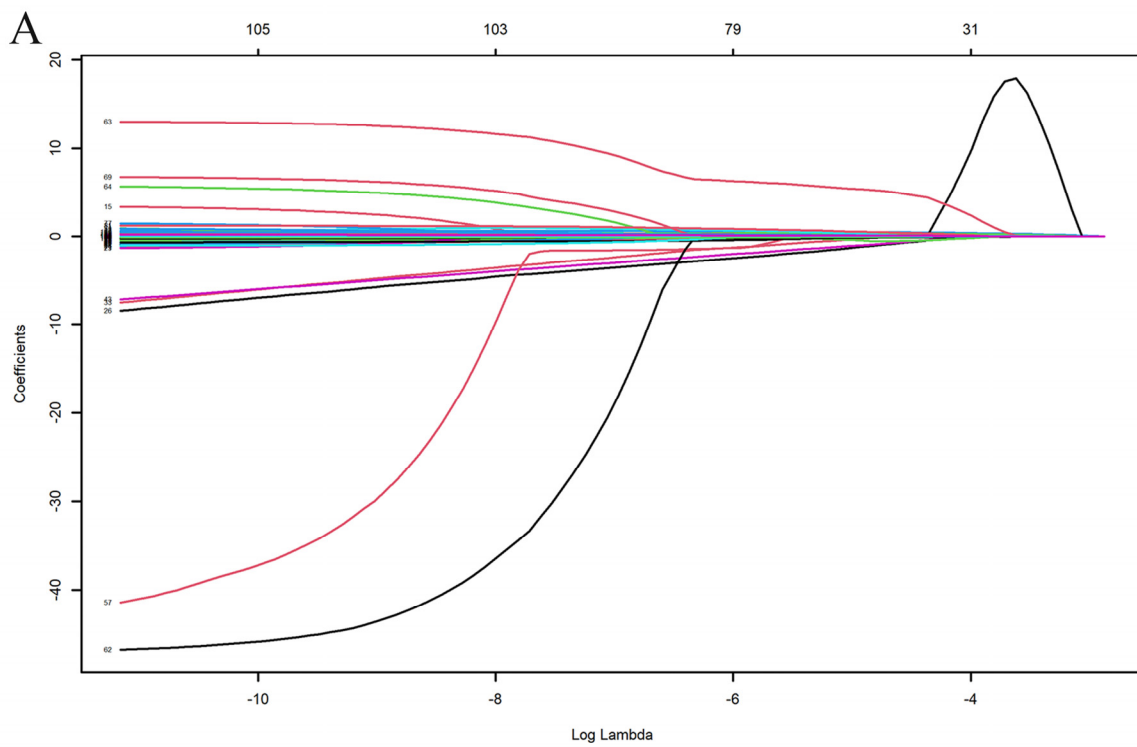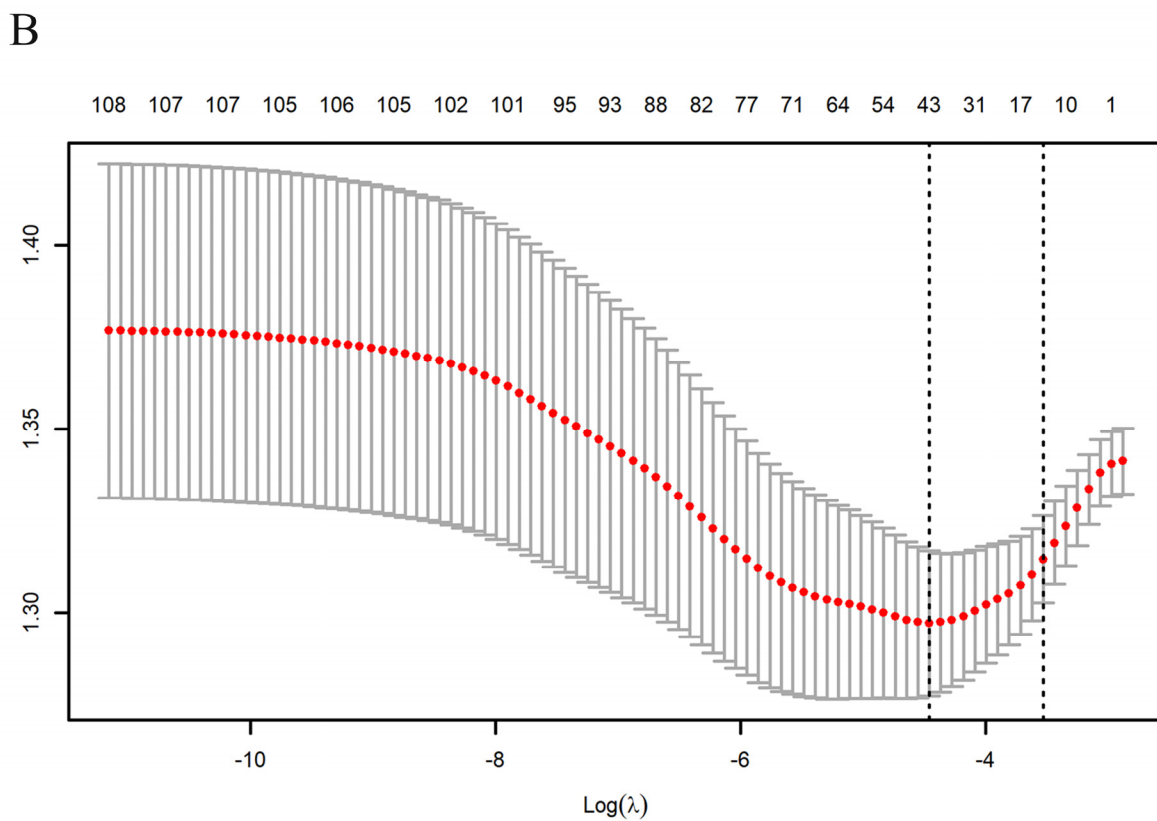

**Figure S1.** (A) Variable selection by LASSO. As  $\lambda$  increases, the coefficients of some variables keep decreasing until they are zero. (B) Plot for LASSO coefficients. The left dotted line is the value of  $\lambda$  at the smallest mean square error, and the right dotted line is the value of  $\lambda$  one standard error away from the smallest mean square error.
